# Supplementary material
Source: PubMed Central journal article supplement (PMC3138510)

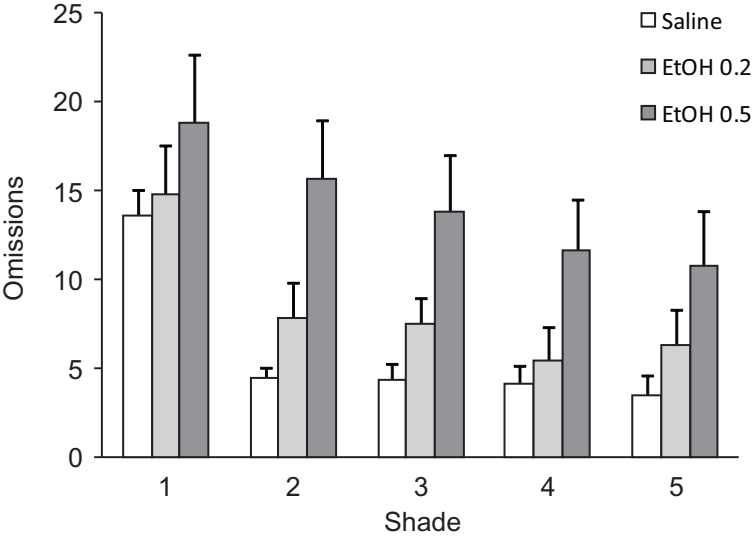

Supplement: supp_bhq244_cercor-2010-00577-File011.pdf [file supp_bhq244_cercor-2010-00577-File011.pdf]
